## Varia

---

### Competition

The *Dr. Heinz Karger Memorial Foundation* invites the submission of original research papers to compete for the 1976 and 1977 award, on the following subjects:

1976: *Methods for the Early Diagnosis of Genetic Disorders*

1977: *Molecular Biology of Metabolic Diseases*

Submission date: Manuscripts marked 'Competition' must reach the publishers S. Karger AG, Arnold-Böcklin-Strasse 25, CH-4011 Basel (Switzerland) not later than February 28 of either year.

The manuscripts shall not exceed 20 typewritten pages, including illustrations, tables and bibliography. They must be typewritten on one side only, double-spaced, and are to be submitted in quadruplicate, and in accordance with the instructions contained in 'Rules for the Preparation of Manuscripts'. This leaflet can be obtained free of charge from the publishers if the request is marked 'Competition'.

Language: English, German or French.

Publication: The winning papers will be published in English in one of the Karger journals.

The award for the prize will be SFr. 7,000.-. The Council of the Foundation will judge the papers and confer the prize.
